# Supplementary material for: Orbital-dependent photodynamics of strongly correlated nickel oxide clusters
Source: Royal Society of Chemistry journal article supplement (doi:10.1039/d2cp00209d), 2022-01-01
Supplement: d2cp00209d1.pdf [file d2cp00209d1.pdf]

**Supporting Information for Publication:**

**Orbital-Dependent Photodynamics of Strongly Correlated Nickel Oxide  
Clusters**

Jacob M. Garcia and Scott G. Sayres\*

School of Molecular Sciences, Arizona State University, Tempe, AZ 85287

Biodesign Center for Applied Structural Discovery, Arizona State University, Tempe, AZ 85287

Neutral nickel oxide clusters are produced using a laser vaporization source and their excited states are subsequently measured through the pump-probe technique, where ionization enables detection using a home-built Wiley-McLaren<sup>19</sup> type time-of-flight mass spectrometer (TOFMS) discussed in the main text (Fig S1). The instrument consists of a laser vaporization source for cluster production and a mass spectrometer that is maintained at high vacuum conditions ( $\sim 7.5 \times 10^{-8}$  Torr). Neutral clusters were ionized by a sequence of sub-35 fs laser pulses from a Ti:Sapphire laser.

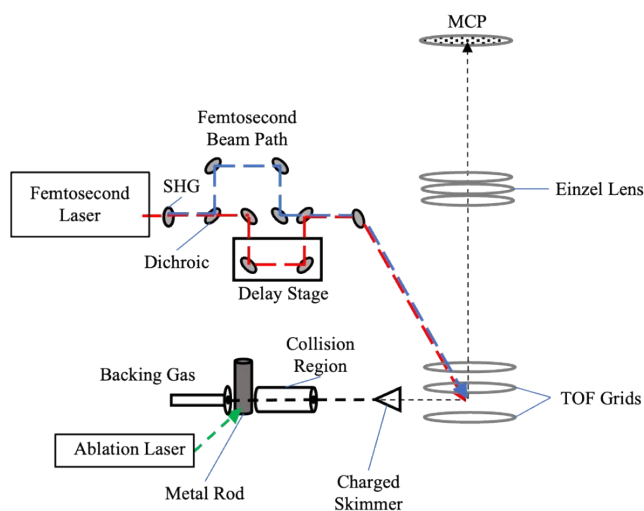

**Fig. S1.** Schematic of the gas phase cluster instrument and mass spectrometer. The femtosecond laser path is shown.

Figures S2-S4 show the overall change in electron density over the summation of the various atomic orbitals. It should be noted that the maximum total electron density transferred from a photoexcitation is 1, but the linear combination of several occupied-virtual pairs that contribute to the photoexcitation can reduce this value. Thus, values less than 1 indicate conflict between orbital pairs (the individual excitations cancel one another for no net change between atomic orbitals), or excitation within the d-d orbitals occurs. The Ni-f, O-s, and O-d orbitals are

involved in the calculation but do not compose a significant percentage of the charge transfer and so are not shown.  $\text{Ni}_6\text{O}_4$  is unique in that it contains a significant population of O-s orbitals.

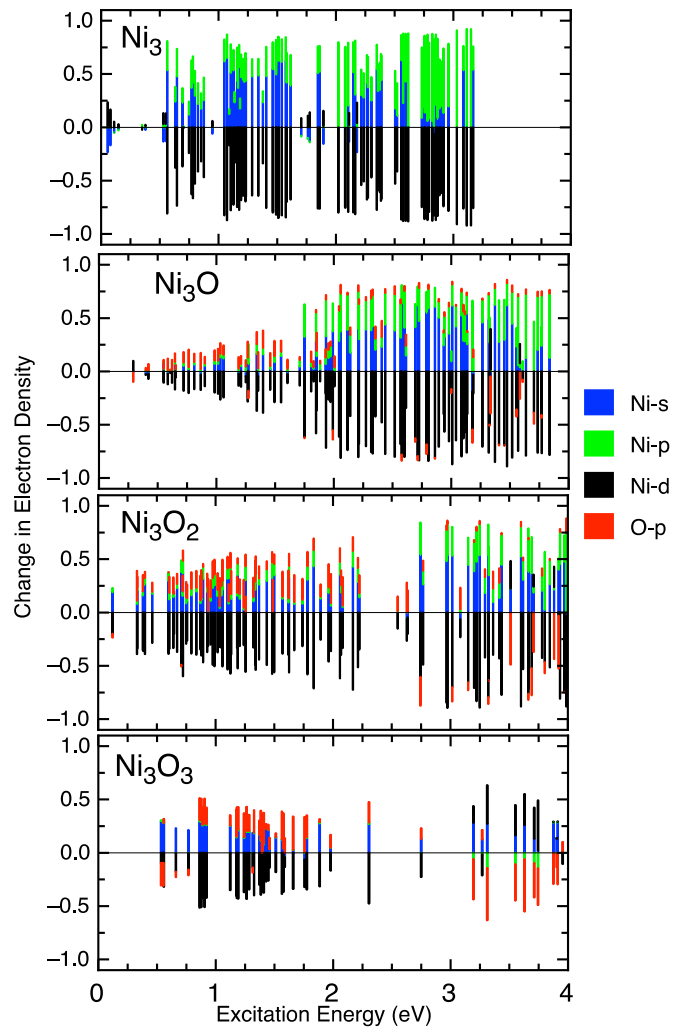

**Fig. S2.** C-squared population analysis of the TD-DFT excited states showing the density of states and change in electron density for the Ni-s, Ni-p, Ni-d, and Ni-p orbitals for each of the  $\text{Ni}_3\text{O}_x$  ( $x < 4$ ) clusters.

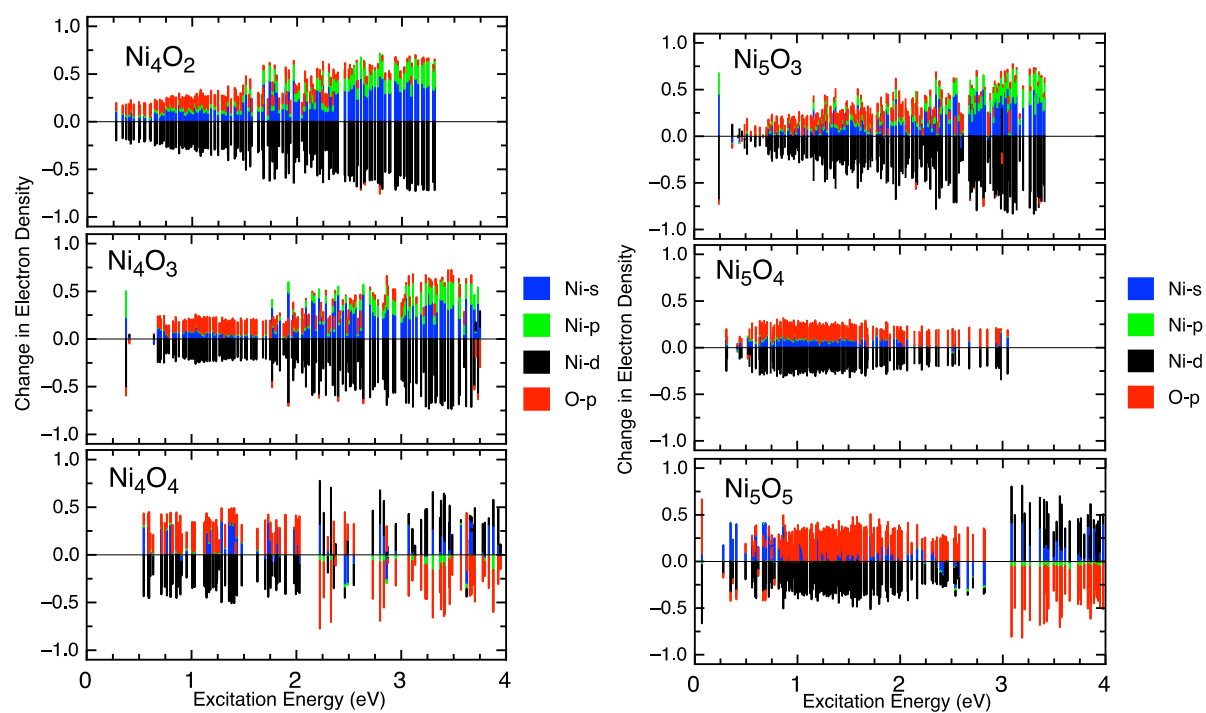

**Fig. S3.** C-squared population analysis of the TD-DFT excited states showing the density of states and change in electron density for the Ni-s, Ni-p, Ni-d, and Ni-p orbitals for each of the  $\text{Ni}_4\text{O}_x$  ( $x=2,3,4$ ) and  $\text{Ni}_5\text{O}_x$  ( $x=3,4,5$ ) clusters.

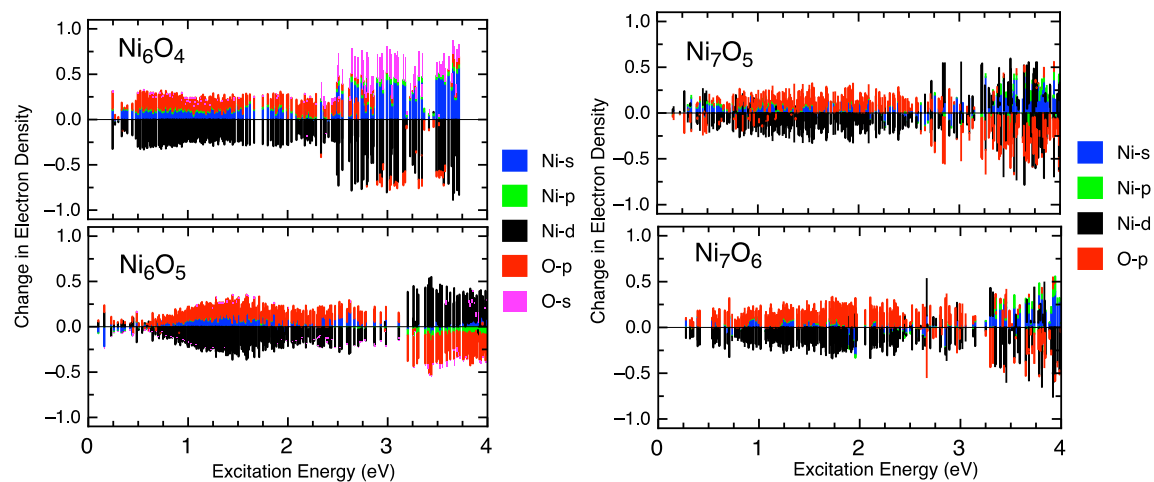

**Fig. S4.** C-squared population analysis of the TD-DFT excited states showing the density of states and change in electron density for the Ni-s, Ni-p, Ni-d, and Ni-p orbitals for each of the  $\text{Ni}_6\text{O}_x$  ( $x=4,5$ ) and  $\text{Ni}_7\text{O}_x$  ( $x=5,6$ ) clusters.

The excited state transients for larger clusters are shown in Fig. S5. Optimized structures lowest energy spin configurations for all clusters are shown in Fig. S6.

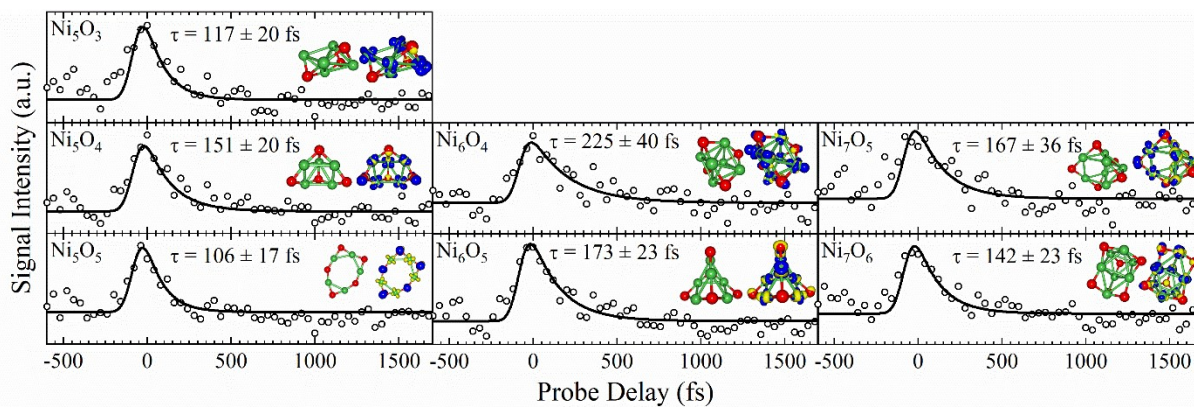

**Fig. S5.** The transients of the  $\text{Ni}_5\text{O}_x$ ,  $\text{Ni}_6\text{O}_x$  and  $\text{Ni}_7\text{O}_x$  series showing the change in excitation lifetime as a result of oxidation. Total fit as a solid black line and lifetime ( $\tau$ ) above each transient.

TD-DFT BPW91 transition densities are presented at an isodensity of  $0.005/\text{\AA}^3$ . Electron densities are yellow, holes are blue, Ni atoms are green, and oxygen atoms are red.

## Cluster Structures and Spin Configuration

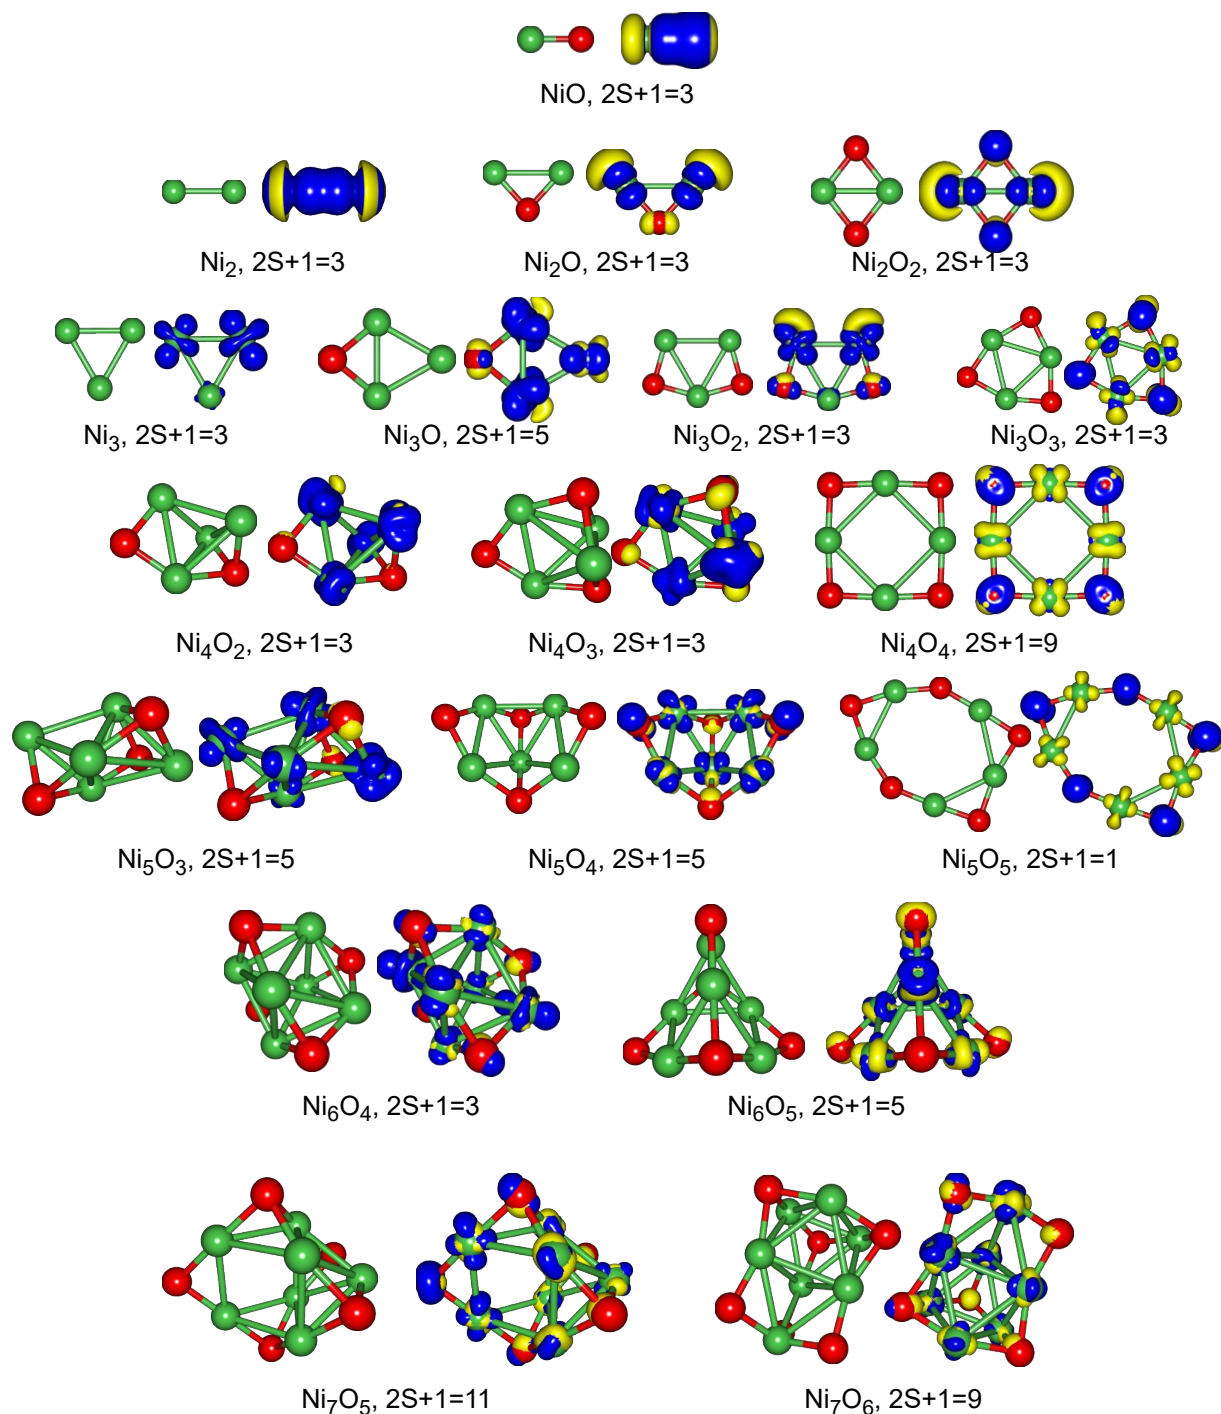

**Fig. S6** TD-DFT BPW91 ground state structures and transition densities are presented at an isodensity of  $0.005/\text{\AA}^3$ . Electron densities are yellow, holes are blue, Ni atoms are green, and oxygen atoms are red. Note:  $\text{Ni}_2$  is shown at an isodensity of  $0.002/\text{\AA}^3$  to show the diffuse electron

## XYZ Coordinates

Optimized xyz coordinates (and spin configurations) of nickel oxide clusters obtained at the ground state geometries using BPW91 and standard 6-311G+(d) basis set.

### NiO (2S+1 = 3)

|    |          |          |           |
|----|----------|----------|-----------|
| Ni | 0.000000 | 0.000000 | 0.364260  |
| O  | 0.000000 | 0.000000 | -1.274911 |

### (NiO)<sub>2</sub> (2S+1 = 3)

|    |           |           |           |
|----|-----------|-----------|-----------|
| Ni | 0.000000  | 1.085678  | -0.000030 |
| Ni | -0.000000 | -1.085678 | -0.000030 |
| O  | -1.404125 | 0.000000  | 0.000105  |
| O  | 1.404125  | -0.000000 | 0.000105  |

### (NiO)<sub>3</sub> (2S+1 = 3)

|    |           |           |           |
|----|-----------|-----------|-----------|
| Ni | 1.328043  | -0.315392 | 0.007794  |
| Ni | -0.939246 | -0.991770 | 0.000321  |
| Ni | -0.391373 | 1.309927  | -0.000470 |
| O  | -1.916220 | 0.456836  | -0.004997 |
| O  | 1.351628  | 1.431724  | 0.005717  |
| O  | 0.561963  | -1.885771 | 0.006944  |

### (NiO)<sub>4</sub> (2S+1 = 9)

|    |           |           |          |
|----|-----------|-----------|----------|
| Ni | 0.070829  | 1.828745  | 0.000000 |
| Ni | 1.828745  | -0.070829 | 0.000000 |
| Ni | -0.070829 | -1.828745 | 0.000000 |
| Ni | -1.828745 | 0.070829  | 0.000000 |
| O  | -1.692371 | 1.828745  | 0.000000 |
| O  | 1.828745  | 1.692371  | 0.000000 |
| O  | 1.692371  | -1.828745 | 0.000000 |
| O  | -1.828745 | -1.692371 | 0.000000 |

### (NiO)<sub>5</sub> (2S+1 = 1)

|    |           |           |          |
|----|-----------|-----------|----------|
| Ni | -1.689008 | -1.316697 | 0.000000 |
| Ni | 0.000000  | 2.141276  | 0.000000 |
| O  | -0.226516 | -2.169247 | 0.000000 |
| O  | 3.100084  | -1.513929 | 0.000000 |
| O  | -3.117102 | -0.380766 | 0.000000 |
| O  | -1.616188 | 2.691967  | 0.000000 |
| O  | 1.571773  | 1.512588  | 0.000000 |
| Ni | 2.509022  | 0.103910  | 0.000000 |
| Ni | 1.460650  | -2.042097 | 0.000000 |



Ni -2.198393 1.073433 0.000000

**(Ni)<sub>2</sub> (2S+1 = 3)**

Ni 0.000000 0.000000 1.069862  
Ni 0.000000 0.000000 -1.069862

**(Ni<sub>2</sub>O) (2S+1 = 3)**

Ni 0.000000 1.163547 -0.159996  
Ni -0.000000 -1.163547 -0.159996  
O 0.000000 -0.000000 1.119974

**(Ni)<sub>3</sub> (2S+1 = 3)**

Ni 0.000000 1.286404 0.000000  
Ni 1.119340 -0.633987 0.000000  
Ni -1.119340 -0.652416 0.000000

**(Ni<sub>3</sub>O) (2S+1 = 5)**

Ni 0.494537 -1.142170 -0.093452  
Ni 0.494392 1.142205 -0.093455  
Ni -1.495323 -0.000064 0.073094  
O 1.772377 0.000103 0.398343

**(Ni<sub>3</sub>O<sub>2</sub>) (2S+1 = 3)**

Ni 1.216779 -0.854176 0.000000  
Ni -1.216805 -0.854714 -0.000000  
O 1.679226 0.797553 0.000000  
O -1.679134 0.797039 -0.000000  
Ni 0.000000 1.253291 0.000000

**(Ni<sub>4</sub>O<sub>2</sub>) (2S+1 = 3)**

Ni -0.827327 -0.748011 -1.068498  
Ni -0.915978 0.075278 1.243093  
Ni 1.112711 -0.945770 0.346563  
Ni 0.450366 1.256149 -0.362709  
O -1.374122 0.818017 -0.362586  
O 2.004921 0.450223 -0.191987

**(Ni<sub>4</sub>O<sub>3</sub>) (2S+1 = 3)**

Ni -0.999957 0.249472 1.158076  
Ni -0.985685 -0.444071 -1.112557  
Ni 0.750493 1.218705 -0.222483  
Ni 1.099198 -1.058078 0.163461  
O -0.670724 -1.462590 0.448069  
O 2.231266 0.284988 0.010914

O -1.084718 1.296500 -0.411722

**(Ni<sub>5</sub>O<sub>3</sub>) (2S+1 = 5)**

Ni -0.305533 1.168431 -0.665141  
Ni -0.307554 -1.184050 -0.635149  
Ni 0.428512 0.017715 1.400640  
Ni -2.038145 0.007998 0.473687  
O -1.609560 -0.015224 -1.320454  
Ni 2.014405 -0.006530 -0.398175  
O 1.187284 1.459059 0.375388  
O 1.184819 -1.450562 0.412472

**(Ni<sub>5</sub>O<sub>4</sub>) (2S+1 = 5)**

Ni 0.006762 0.017516 -1.339334  
Ni -1.373192 1.261698 0.215626  
Ni 1.417188 1.206952 0.230885  
Ni 1.211528 -1.257850 0.325735  
Ni -1.266030 -1.209339 0.311517  
O 0.039204 1.816149 -0.833176  
O 2.207819 -0.065789 1.120634  
O -2.223210 0.021086 1.095954  
O -0.031058 -1.791036 -0.909245

**(Ni<sub>6</sub>O<sub>4</sub>) (2S+1 = 3)**

Ni -0.005864 1.268372 -1.201304  
Ni -0.003204 1.217069 1.251257  
Ni 0.012111 -1.267296 1.202325  
Ni 0.009301 -1.216475 -1.252241  
Ni -1.815499 -0.011485 0.001597  
Ni 1.782067 0.009701 -0.001641  
O -1.236479 -0.042329 1.733593  
O -1.239924 0.029036 -1.731309  
O 1.284766 -1.767349 -0.037217  
O 1.265443 1.781041 0.034956

**(Ni<sub>6</sub>O<sub>5</sub>) (2S+1 = 5)**

Ni 1.75401900 0.61705900 -0.81145800  
Ni -0.55793700 0.41788500 -1.52753800  
O 0.91721500 0.96393500 -2.29230300  
Ni -1.76618600 0.80089400 0.57056800  
Ni 0.51343300 0.96477700 1.30351600  
Ni 1.17083400 -1.32890700 0.59707400  
O 2.14221800 0.19121000 0.94212200  
O 0.06514300 -2.67278900 0.45206600

|    |             |             |             |
|----|-------------|-------------|-------------|
| O  | -0.94476600 | 1.80317600  | 1.76500800  |
| Ni | -1.11196900 | -1.49233200 | -0.11936000 |
| O  | -2.18748900 | -0.21334800 | -0.91170300 |

**(Ni<sub>7</sub>O<sub>5</sub>) (2S+1 = 11)**

|    |             |             |             |
|----|-------------|-------------|-------------|
| Ni | 2.18367800  | -0.05438700 | -0.00117000 |
| Ni | 0.43376100  | 1.23390900  | 1.18050400  |
| Ni | -1.75498000 | 1.23160800  | 0.00045900  |
| Ni | 0.36380700  | -1.24032500 | -1.17963200 |
| Ni | 0.42552800  | 1.21082600  | -1.19704200 |
| Ni | 0.35790400  | -1.21789700 | 1.19642800  |
| Ni | -1.83170400 | -1.16950200 | 0.00351500  |
| O  | -0.48413200 | -2.41086200 | 0.01690000  |
| O  | -3.08002100 | 0.07363700  | -0.00994800 |
| O  | 1.65609500  | -0.02571100 | 1.81512100  |
| O  | 1.65505600  | -0.05168200 | -1.81642600 |
| O  | -0.36997600 | 2.43480500  | -0.01636100 |

**(Ni<sub>7</sub>O<sub>6</sub>) (2S+1 = 9)**

|    |             |             |             |
|----|-------------|-------------|-------------|
| Ni | 1.53661500  | -1.44236500 | -0.06564000 |
| Ni | 1.53483400  | 0.66487600  | 1.28303400  |
| Ni | -0.45699400 | 1.54340600  | 0.06995100  |
| Ni | -0.45654200 | -0.71176700 | -1.37066500 |
| Ni | 1.53736100  | 0.77856800  | -1.21662300 |
| Ni | -0.45677600 | -0.83311900 | 1.30126200  |
| Ni | -2.50261500 | 0.00026900  | -0.00089500 |
| O  | -2.18716200 | -0.80174900 | -1.54739200 |
| O  | -2.18740100 | 1.74065100  | 0.07912100  |
| O  | 1.32882500  | -1.11635800 | 1.74456000  |
| O  | 1.32896800  | -0.95244800 | -1.83895400 |
| O  | 1.32864800  | 2.06872100  | 0.09403900  |
| O  | -2.18746700 | -0.93835800 | 1.46714400  |
